# Supplementary material for: Giant valley polarization in Janus 1T-MNY (M = Mo, W; Y = Br, Cl) monolayers: a new class of ferrovalley materials
Source: Royal Society of Chemistry journal article supplement (doi:10.1039/d5cp04686f), 2026-01-01
Supplement: d5cp04686f1.pdf [file d5cp04686f1.pdf]

## Supporting Information for

### Giant Valley Polarization in Janus 1T-MNY ( $M=\text{Mo, W}$ ; $Y=\text{Br, Cl}$ ) monolayers:

#### A New Class of Ferrovalley Materials

Ning Wang, Jianping Zhang, Weixin Liu, Xuanzheng Chen, Weixiao Ji, Changwen Zhang, Shishen Yan, Yaping Wang\*, and Shengshi Li\*

*Spintronics Institute & School of Physics and Technology, University of Jinan, Jinan, Shandong, 250022, People's Republic of China.*

Corresponding authors: [sps\\_wangyp@ujn.edu.cn](mailto:sps_wangyp@ujn.edu.cn) (Y. Wang); [sdy\\_liss@ujn.edu.cn](mailto:sdy_liss@ujn.edu.cn) (S. Li)

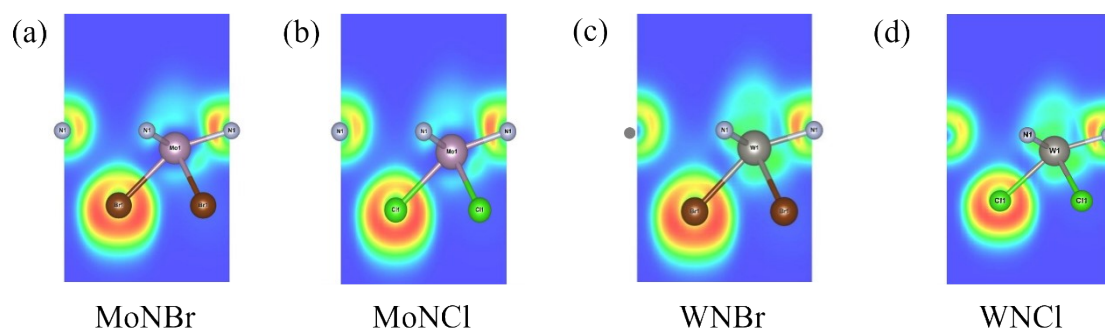

**Fig. S1.** Electron localization function of MoNBr, MoNCl, WNBr, and WNCl monolayers.

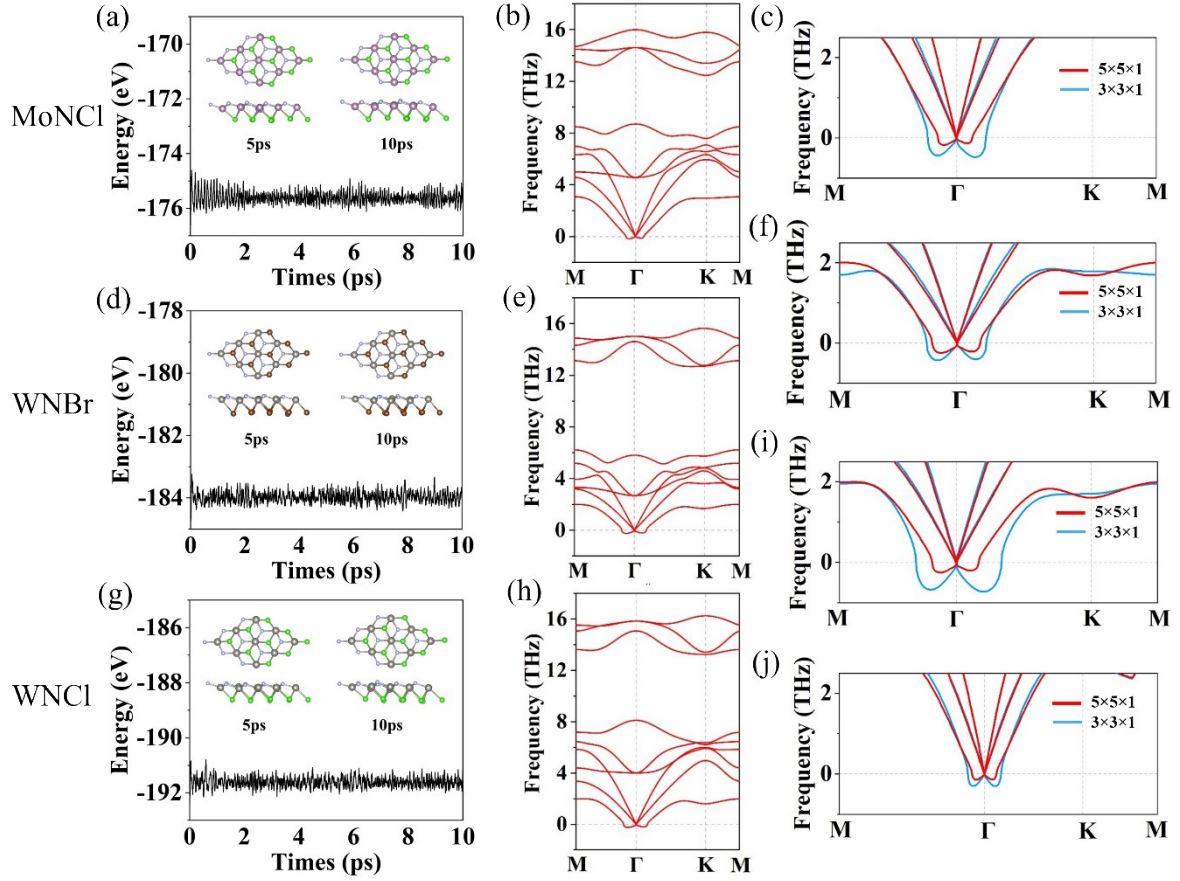

**Fig. S2.** The total energy evolution over time, phonon spectrum, and magnified views of the acoustic branches calculated at different supercell sizes for the MoNCl (a-c), WNBBr (d-f), and WNCI (g-i) monolayers. The insets in (a), (d), and (g) are structural snapshots of MoNCl, WNBBr, and WNCI monolayers at 5ps and 10 ps. (j) Magnified views of the acoustic branches calculated at different supercell sizes for the MoNBr monolayer.

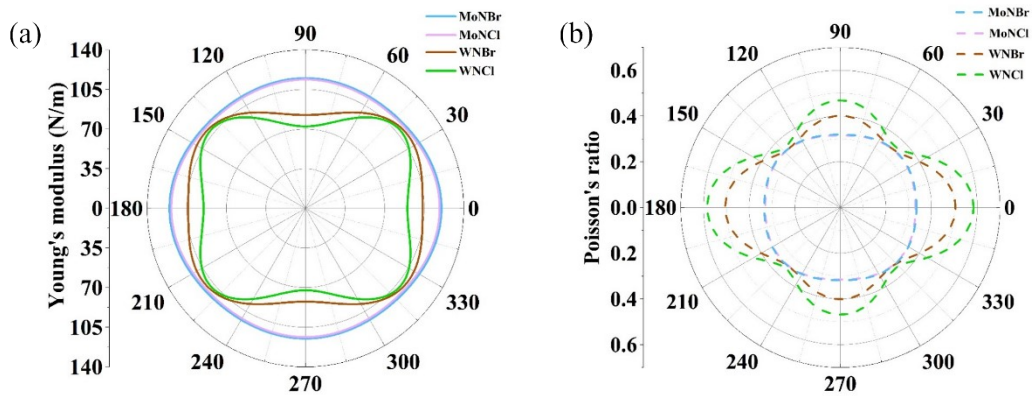

**Fig. S3.** (a) Young's modulus and (b) Poisson's ratio of MNY monolayers.

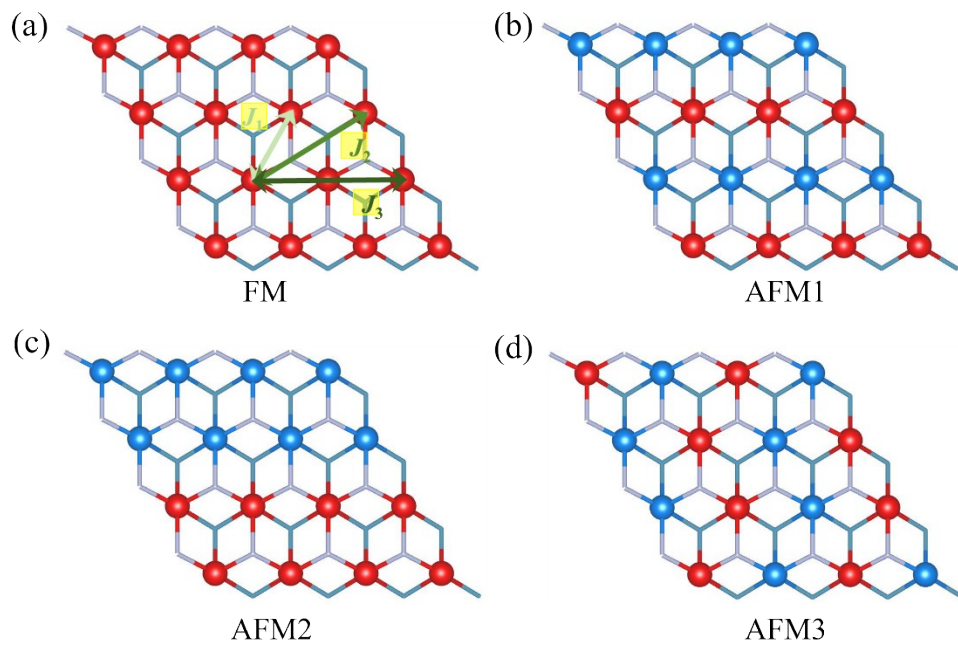

**Fig. S4.** Top view of ferromagnetic (a) and antiferromagnetic (b-d) configuration for  $MNY$  monolayers.  $J_1$ ,  $J_2$  and  $J_3$  in the (a) represent the nearest-neighbor exchange coupling parameter.

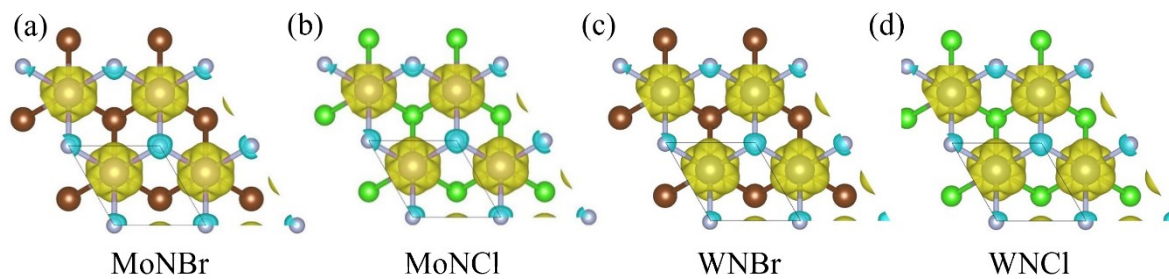

**Fig. S5.** Spin density distribution of MoNBr, MoNCl, WNBr, and WNCI monolayers.

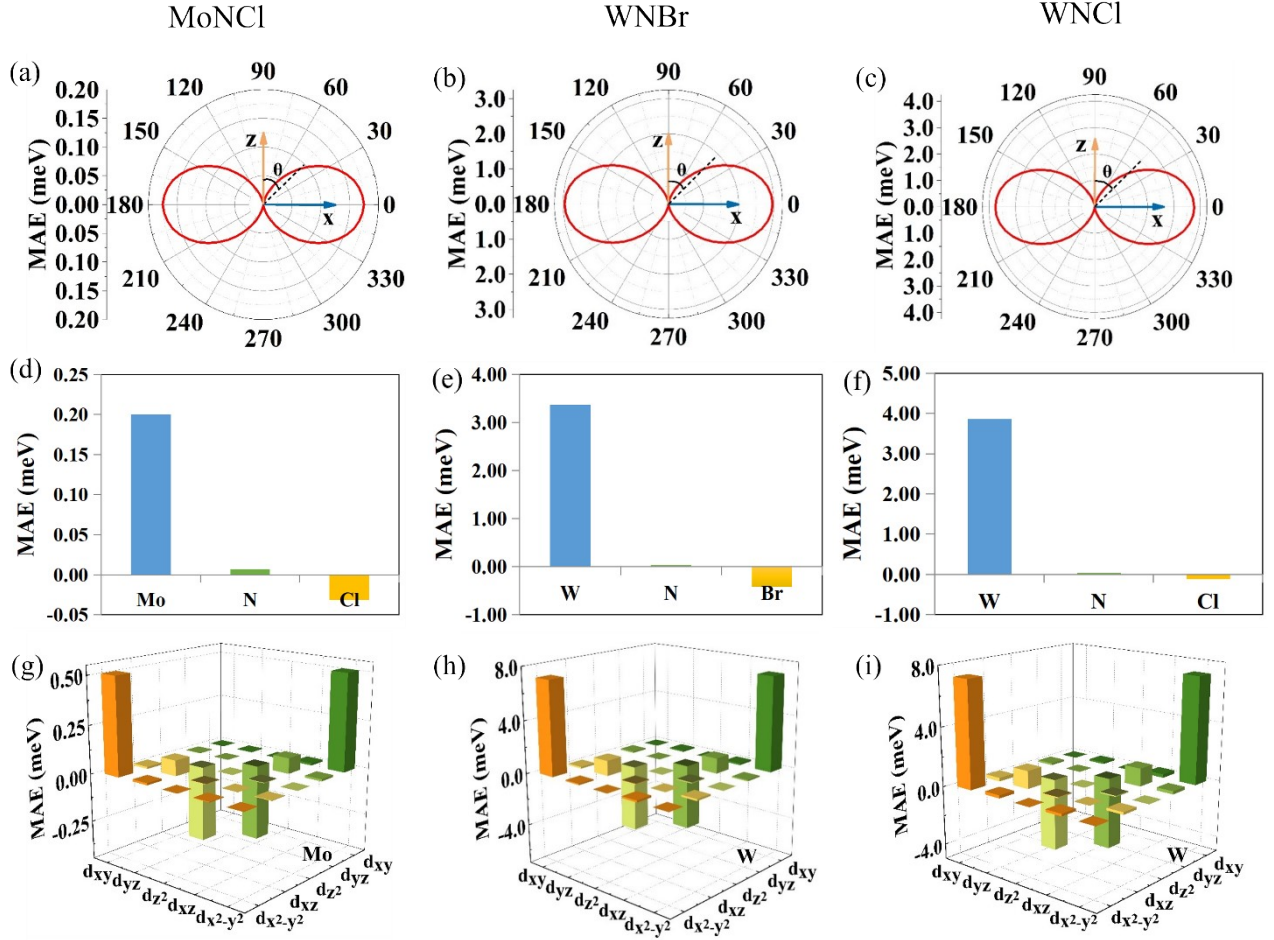

**Fig. S6.** Angular dependence of MAE (a-c), atom-resolved MAE (d-f) and orbital-resolved MAE (g-i) for the MoNCl, WNBr, and WNCI monolayers.

**Table S1.** Nearest-neighbor ( $J_1$ ), next-nearest-neighbor ( $J_2$ ), and third-nearest-neighbor ( $J_3$ ) exchange coupling parameters of *MNY* monolayers.

|                   | MoNBr  | MoNCl  | WNBr  | WNCI  |
|-------------------|--------|--------|-------|-------|
| $J_1(\text{meV})$ | 50.26  | 60.22  | 21.27 | 21.33 |
| $J_2(\text{meV})$ | -23.17 | -32.98 | -0.69 | -0.72 |
| $J_3(\text{meV})$ | 12.3   | 17.42  | 0.72  | 0.86  |

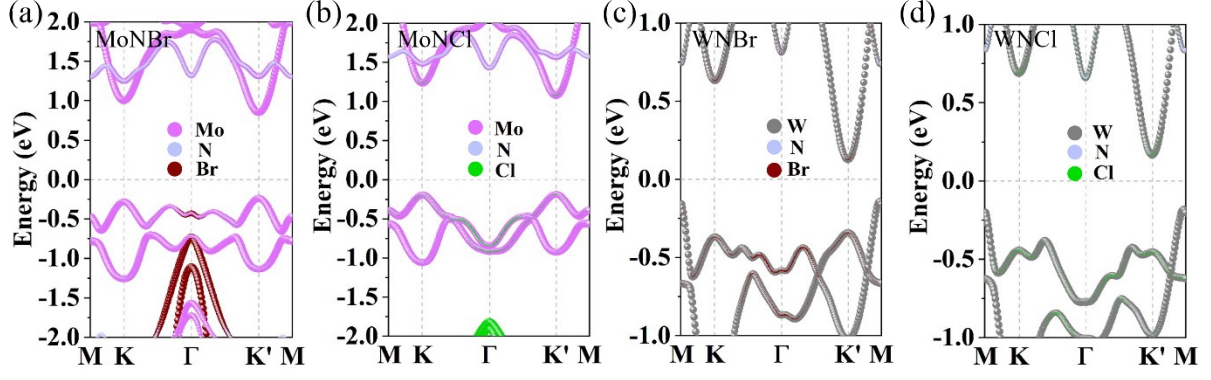

**Fig. S7.** Atom-resolved band structures of MoNBr, MoNCl, WNBr, and WNCI monolayers.

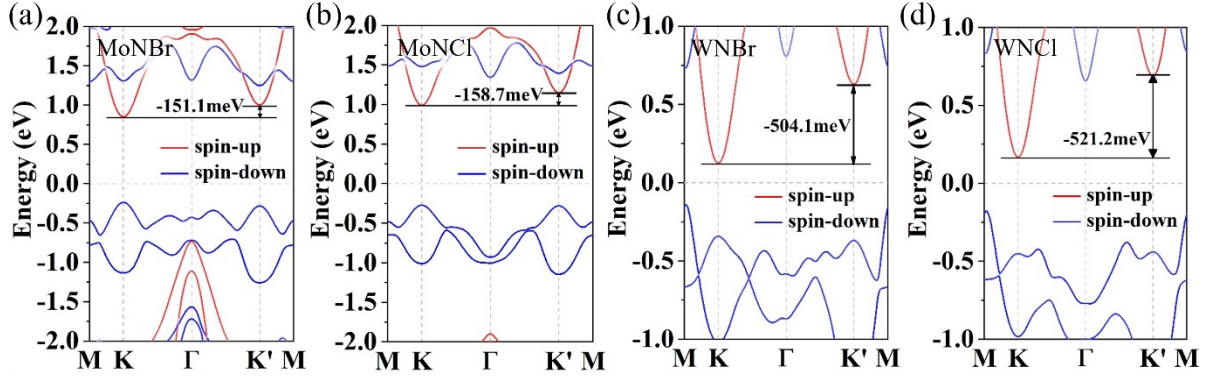

**Fig. S8.** Calculated SOC band structures of MoNBr, MoNCl, WNBr, and WNCI monolayers with downward magnetization.



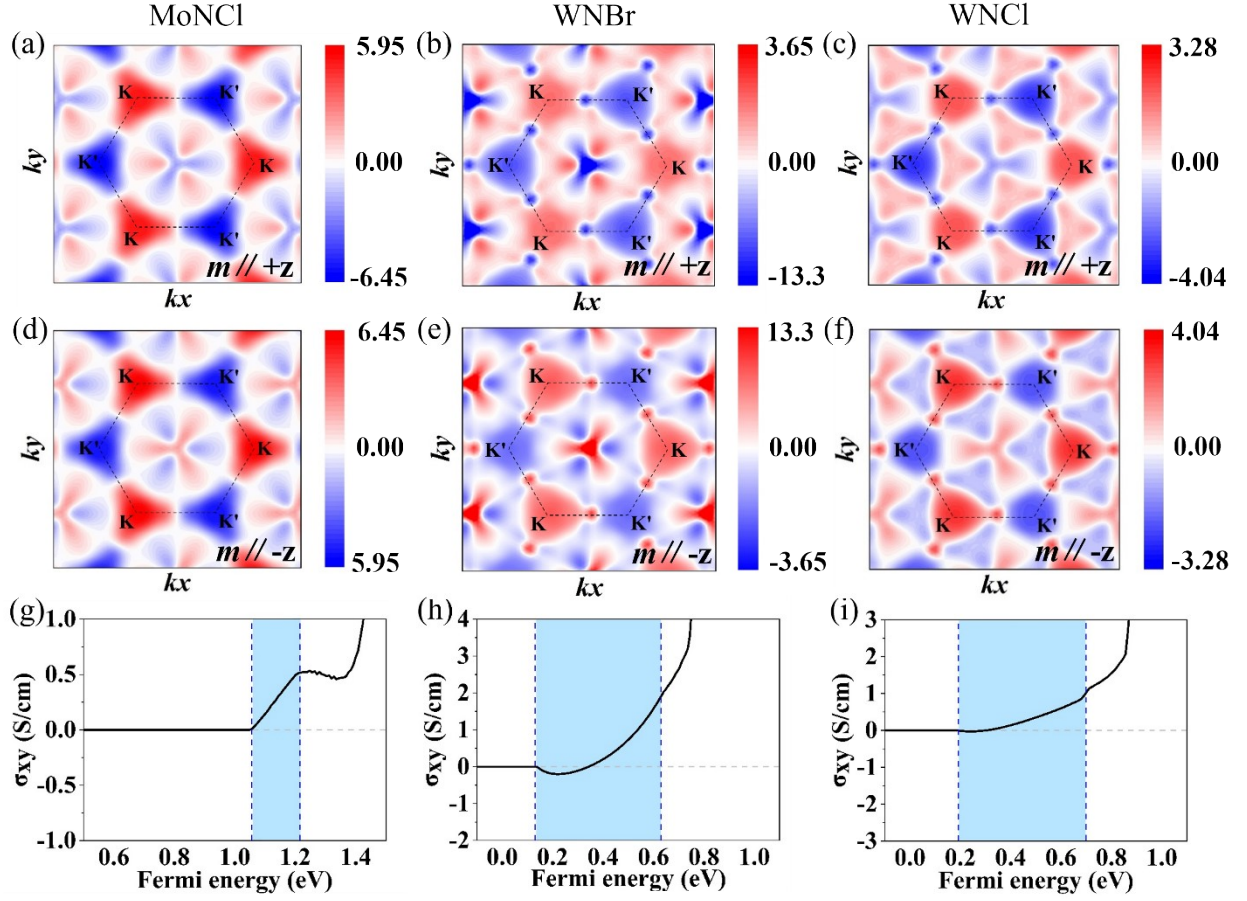

**Fig. S9.** The Berry curvature distributions in the Brillouin zone of MoNCl (a, d), WNBBr (b, e), and WNCI (c, f) monolayers with magnetization along  $+z$  and  $-z$  directions. (g-h) Calculated anomalous Hall conductivity  $\sigma_{xy}$  as a function of Fermi energy for MoNCl, WNBBr, and WNCI monolayers.

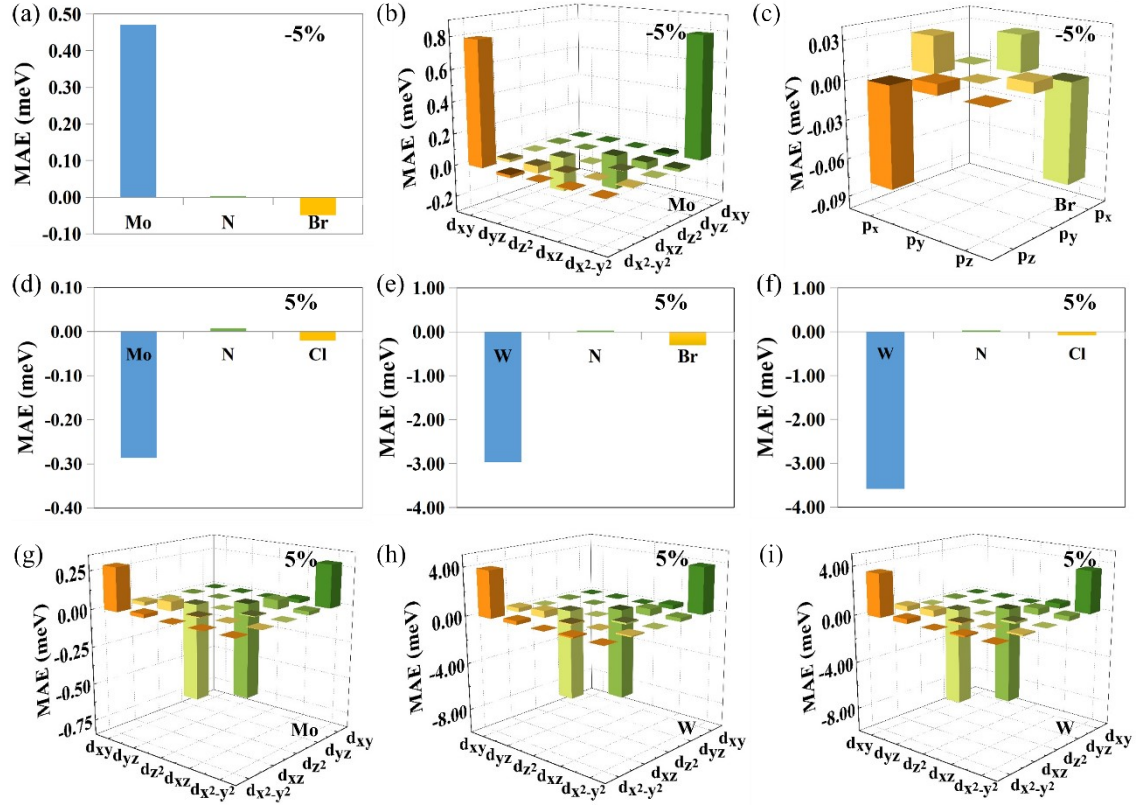

**Fig. S10.** (a-c) Atom- and orbital-resolved MAE of the MoNBr monolayer under 5% compressive strain. (d-i) Atom- and orbital-resolved MAE for the MoNCl, WNBr, and WNCI monolayers under 5% tensile strain.

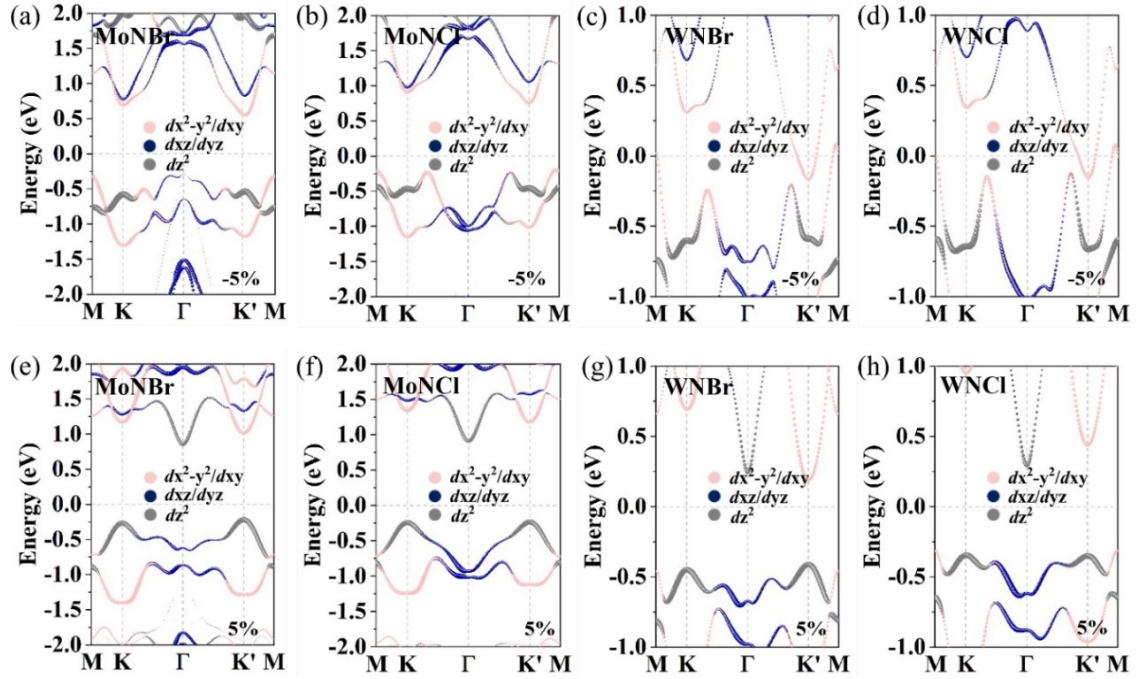

**Fig. S11.** Orbital-resolved SOC band structures of the MoNBr, MoNCl, WNBr, and WNCI monolayers under 5% compressive strain (a-d) and 5% tensile strain (e-h).

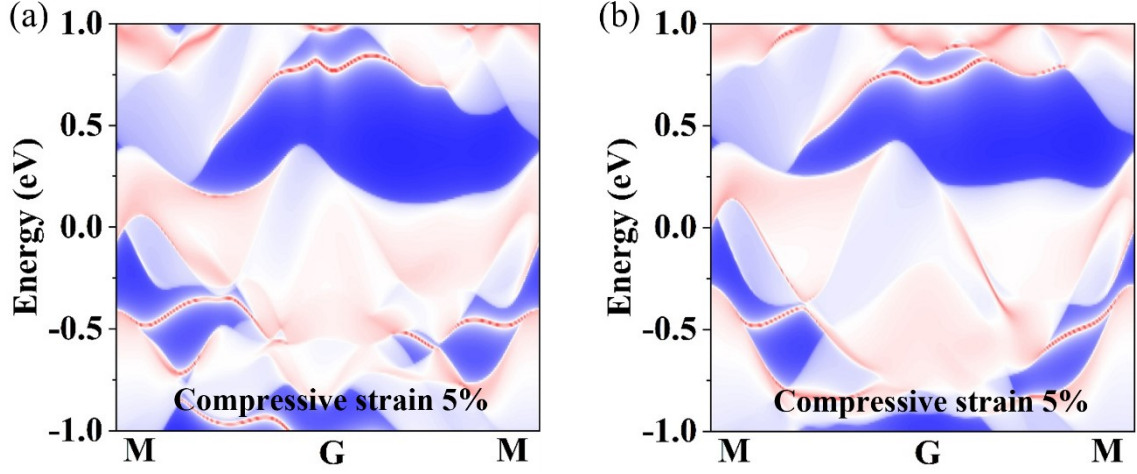

**Fig. S12.** Calculated edge states of WNBBr (a) and WNBCl (b) monolayers under 5% compressive strain.

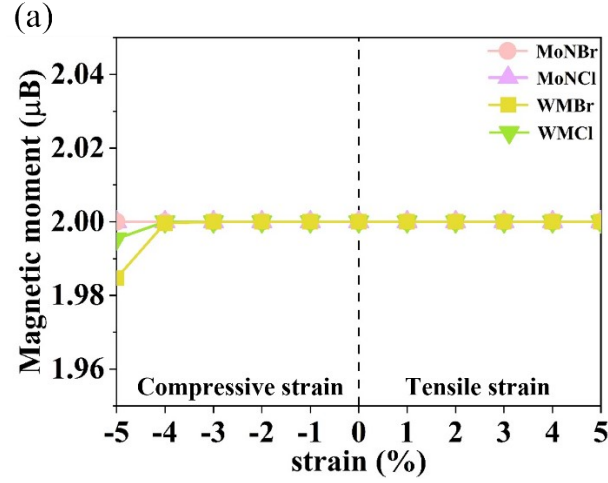

**Fig. S13.** Strain-dependent variation of the net magnetic moment of *MNY* monolayers.

**Table S2.** Calculated piezoelectric stress coefficients  $e_{11}$  and  $e_{31}$  along with their respective ionic and electronic contributions.

|       | $e_{11}$<br>(C/m) | $e_{11}^{elc}$<br>(C/m) | $e_{11}^{ion}$<br>(C/m) | $e_{31}$<br>(C/m) | $e_{31}^{elc}$<br>(C/m) | $e_{31}^{ion}$<br>(C/m) |
|-------|-------------------|-------------------------|-------------------------|-------------------|-------------------------|-------------------------|
| MoNBr | -1.03             | -0.14                   | -0.89                   | 0.09              | 0.03                    | 0.06                    |
| MoNCl | -0.67             | 0.23                    | -0.90                   | 0.41              | 0.40                    | 0.01                    |
| WNBBr | -0.33             | 0.23                    | -0.56                   | -0.34             | -0.44                   | 0.10                    |
| WNBCl | -0.32             | 0.88                    | -1.20                   | -0.09             | -0.12                   | 0.03                    |
